1  
2  
3  
4  
5  
6  
7  
8  
9  
10  
11  
12  
13  
14  
15  
16  
17  
18  
19  
20  
21  
22  
23  
24  
25  
26

**GLUT4 expression and glucose transport in human induced pluripotent stem cell-derived cardiomyocytes**

**Peter R.T Bowman<sup>1</sup>, Godfrey L. Smith<sup>2</sup> and Gwyn W. Gould<sup>1,\*</sup>**

<sup>1</sup>Henry Wellcome Laboratory of Cell Biology, Institute of Molecular Cell and Systems Biology, Davidson Building, College of Medical, Veterinary and Life Sciences, University of Glasgow, Glasgow G12 8QQ. United Kingdom.

<sup>2</sup>Institute of Cardiovascular and Medical Sciences, College of Medical, Veterinary and Life Sciences, University of Glasgow, Glasgow G12 8QQ. United Kingdom.

\*corresponding author (GWG)

[gwyn.gould@glasgow.ac.uk](mailto:gwyn.gould@glasgow.ac.uk)

27

## 28 **Abstract**

29 Induced pluripotent stem cell derived cardiomyocytes (iPSC-CM) have the  
30 potential to transform regenerative cardiac medicine and the modelling of cardiac  
31 disease. This is of particular importance in the context of diabetic cardiomyopathy  
32 where diabetic individuals exhibit reduced cardiac diastolic contractile performance in  
33 the absence of vascular disease, significantly contributing towards high cardiovascular  
34 morbidity. In this study, the capacity of iPSC-CM to act as a novel cellular model of  
35 cardiomyocytes was assessed. The diabetic phenotype is characterised by insulin  
36 resistance, therefore there was a specific focus upon metabolic parameters. Despite  
37 expressing crucial insulin signalling intermediates and relevant trafficking proteins, it  
38 was identified that iPSC-CM do not exhibit insulin-stimulated glucose uptake. iPSC-  
39 CM are spontaneously contractile however contraction mediated uptake was not found  
40 to mask any insulin response. The fundamental limitation identified in these cells was  
41 a critical lack of expression of the insulin sensitive glucose transporter GLUT4. Using  
42 comparative immunoblot analysis and the GLUT-selective inhibitor BAY-876 to  
43 quantify expression of these transporters, we show that iPSC-CM express high levels  
44 of GLUT1 and low levels of GLUT4 compared to primary cardiomyocytes and cultured  
45 adipocytes. Interventions to overcome this limitation were unsuccessful. We suggest  
46 that the utility of iPSC-CMs to study cardiac metabolic disorders may be limited by  
47 their apparent foetal-like phenotype.

48

## 49 **Introduction**

50 Diabetes is one of the leading healthcare challenges worldwide. Whilst the most  
51 common major complication of this condition is vascular disease and therefore  
52 increased incidence of stroke or myocardial infarction, there is also a significantly  
53 elevated direct risk of heart failure [1]. This is due in part to an impairment of diastolic  
54 cardiac contractile function in diabetic individuals independent of vascular disease  
55 termed diabetic cardiomyopathy (DCM) [2–4]. Given the high rate of cardiovascular  
56 mortality associated with diabetes combined with the lack of DCM specific treatments  
57 available, improved understanding of the pathophysiological mechanisms underlying  
58 this condition is of clinical relevance.

59 As DCM progresses over time, structural changes such as concentric  
60 hypertrophy and fibrosis are observable [5,6] and will undoubtedly contribute to further  
61 impairments in cardiac function. However, there is evidence from human populations  
62 that reduced cardiac contractility is observable prior to the onset of structural  
63 remodelling [7], suggesting that this is a (maladaptive) response to - rather than central  
64 causal factor of - this condition. Accordingly, the original physiological deficit  
65 underlying DCM likely originates from within the individual contractile units of the heart  
66 – the cardiomyocytes.

67 It is challenging to obtain information regarding this pathophysiological  
68 mechanism from human samples. However, the *db/db* mouse model captures several

69 clinical features of DCM such as weight gain and impaired cardiac function in the  
70 presence of hyperglycemia and hyperinsulinemia but absence of atherosclerosis or  
71 hypertension [8]. Impaired cardiac contractile function has been recorded from these  
72 mice through *in vivo* echocardiography (impaired ejection fraction and E/A ratio), *ex*  
73 *vivo* Langendorff working heart preparations (reduced rate of LV pressure  
74 development and decay), and individual isolated cardiomyocytes (impaired fractional  
75 shortening and rate of relaxation) [9,10]. These studies identified deficits in  
76 intracellular calcium handling as the fundamental mechanism underlying this impaired  
77 contractile activity.

78 In healthy muscle and adipose tissue, activation of the insulin receptor in turn  
79 activates signalling cascades that ultimately initiate the translocation of the glucose  
80 transporter GLUT4 from a specialised intracellular retention site to the plasma  
81 membrane [11]. A defining feature of the (type II) diabetic phenotype is the presence  
82 of peripheral insulin resistance (IR), whereby this action of insulin is impaired. There  
83 is evidence to suggest that reduced glucose uptake coupled with coinciding increased  
84 fatty acid uptake and oxidation in the diabetic heart precedes and possibly contributes  
85 towards impaired cardiomyocyte calcium handling/contractility. The oxidation of fat is  
86 associated with an increased oxygen cost and in line with this reduced cardiac  
87 efficiency has been recorded from diabetic individuals [12], thereby placing increased  
88 strain upon the heart. Additionally, the intracellular PCr/ATP ratio was observed to be  
89 reduced in human diabetic myocardium [13]. This would be expected to impair the  
90 high energy phosphate shuttle system and is linked to a reduction in maximum  
91 workload capacity [14]. Combined, these mechanisms may create a large mismatch  
92 between ATP availability and demand, and therefore limit the ATPase action of  
93 proteins including SERCA and myosin. In combination this could account for impaired  
94 contractility in DCM. In support of this, overexpression of GLUT4 in the *db/db* mouse  
95 model normalises the observed aberrant metabolic and contractile cardiac phenotype  
96 [15,16].

97 Many studies suggest that insulin signalling and/or glucose metabolism (or a  
98 lack thereof) have important roles in the development of DCM. For example, insulin  
99 signalling may be required to reduce mitochondrial uncoupling and enable economical  
100 oxidation of fatty acids [17], and the more oxygen efficient oxidation of glucose may  
101 be essential under periods of subclinical myocardial stress, which likely precede DCM.  
102 Although the use of animal-based DCM models has facilitated significant progress in  
103 this area of research, human studies are necessary to fully understand these  
104 mechanisms to the extent that effective interventions can be developed. The  
105 generation of human induced pluripotent stem cell derived cardiomyocytes (iPSC-CM)  
106 was first published in 2007 [18] and could be of relevance to this field. iPSC-CM have  
107 gained attention due to their potential to act as both the basis of regenerative medicine  
108 interventions in the context of myocardial infarction, and also as a novel cellular model  
109 for different disease phenotypes, including DCM. Whilst these cells exhibit  
110 cardiomyocyte specific gene/protein expression and general function, it is widely  
111 accepted that they correspond to foetal-like cardiomyocytes with regards to their

112 electrophysiology, structure, and calcium handling [19,20]. Particularly apparent  
113 limitations are their small circular phenotype and lack of t-tubules, which results in non-  
114 uniform intracellular calcium release across the width of the cells and contributes to  
115 their relatively weak contractile output [21,22].

116 It has been shown that through culturing iPSC-CM in medium designed to  
117 replicate the blood chemistry of a diabetic individual a phenotype corresponding to  
118 DCM was induced in iPSC-CMs, based upon the onset of cellular hypertrophy,  
119 reduced frequency of calcium transients, and an increased irregularity of contractile  
120 rate [23]. However, these studies did not examine the glucose transport or insulin-  
121 sensitivity of iPSC-CMs, and therefore could not determine if these cells exhibited (or  
122 were even capable of exhibiting) insulin resistance. Whilst prior work has  
123 demonstrated that under standard high glucose cell culture conditions these cells rely  
124 primarily upon glycolysis to generate ATP, they have been shown to have a degree of  
125 metabolic flexibility [24]. However, there is no evidence to indicate whether or not  
126 iPSC-CM exhibit insulin stimulated glucose transport or GLUT4 trafficking, a defining  
127 feature of mature insulin sensitive cardiomyocytes. Therefore, the key aim of this study  
128 was to investigate whether iPSC-CM exhibit insulin-stimulated glucose uptake in order  
129 to assess their potential to act as the basis of a novel cellular model of DCM.

130

## 131 **Materials and Methods.**

### 132 **Cell Culture**

133 iPSC-CM were commercially obtained directly from Axiogenesis [note this  
134 company has recently merged with Pluriomics to form NCardia] (#Ax-B-HC02-1M) and  
135 Cellular Dynamics International (CDI; #CMC-100-012-000.5). Upon receipt, cells were  
136 transferred to liquid nitrogen for long term storage. Thereafter, when required for use,  
137 cells were retrieved and plated according to manufacturer's instructions into wells of a  
138 96-well plate coated with fibronectin from bovine plasma (Sigma) at a final  
139 concentration of  $\sim 2 \mu\text{g}/\text{cm}^2$ . Axiogenesis and CDI iPSC-CM were plated as  
140 recommended at a density of 35,000 or 50,000 viable cells per well respectively,  
141 unless stated otherwise. Cells were maintained in a sterile humidified incubator (37°C,  
142 5% CO<sub>2</sub>) in the appropriate maintenance medium provided by the manufacturers, and  
143 was replaced 4-24 hours post plating, and every 24-48 hours thereafter.

144 3T3-L1 fibroblasts were obtained directly from ATCC (#CL-173) and grown and  
145 differentiated as outlined previously [25].

146

### 147 **Primary rabbit cardiomyocyte isolation.**

148 Procedures were undertaken in accordance with the United Kingdom Animals  
149 (Scientific Procedures) Act of 1986 under a project licence (PPL70/8835) and  
150 conform to the Guide for the Care and Use of Laboratory Animals published by the

151 US National Institutes of Health and approved by the Glasgow University Ethical  
152 Review Board. White rabbits (20 weeks old; 3.0–3.5 kg) were euthanized with an  
153 intravenous injection of sodium pentobarbital (100 mg/kg) and 2500 IU heparin.  
154 Excised hearts were reverse perfused on a Langendorff rig with a Krebs buffer  
155 supplemented with 5000 U/mL heparin. Subsequently, protease (33 µg/mL) and  
156 collagenase (217 IU/mL) were added to this solution for approximately 15 min, prior  
157 to manual mincing with a sterile surgical scalpel blade. Finally, the solution was  
158 filtered to remove unprocessed tissue. Where required, cell lysates were generated  
159 by pelleting cells and then resuspending them in RIPA buffer. Cells were maintained  
160 on ice for 20 min in between 2 rounds of manual homogenisation via a Dounce style  
161 tissue grinder. Thereafter lysates were centrifuged at 17,500 x g for 15 min at 4°C  
162 and the supernatant was collected.

163 When used for measurement of glucose uptake, cardiomyocytes were  
164 resuspended in several cycles of Krebs buffer (130 mM NaCl, 5 mM Hepes, 4.5 mM  
165 KCl, 0.4 mM NaH<sub>2</sub>PO<sub>4</sub>, 3.5 mM MgCl<sub>2</sub>, 10 mM glucose, 140 µM CaCl<sub>2</sub>) supplemented  
166 with increasing concentrations of calcium chloride, until a final concentration of 1.8  
167 mM was attained. Thereafter cells were plated at 15,000 viable cells per well of 96-  
168 well plates, maintained in Medium 199 (1 mM L-glutamine, 5 mM creatine, 5 mM  
169 taurine, 5 mM carnitine), and assayed approximately 3 hours post-plating.

170

## 171 **Generation of primary mouse cardiomyocyte lysates.**

172 Frozen segments of myocardial tissue from 20 week old male 129/Sv mice were  
173 kindly donated by Dr Anna White. These were then manually diced in RIPA buffer prior  
174 to 2 rounds of homogenisation (with 20 min break) using a Dounce style tissue grinder,  
175 whilst being kept on ice at all times. Lysates were then centrifuged at 17,500 x g for  
176 15 min at 4°C and the supernatant was collected. Due to the low output obtained,  
177 lysates from 2-4 individual hearts were pooled to form each of the samples used for  
178 subsequent immunoblotting.

179

## 180 **SDS-PAGE and Immunoblotting**

181 iPSC-CM and 3T3-L1 adipocyte lysates were generated directly via application  
182 of 2x Laemmli sample buffer (LSB) for 20 min whilst plates were maintained on ice.  
183 Thereafter, the samples were collected and heated to 65°C for 10 min prior to  
184 immediate use, or temporary storage at -20°C. Prior to immunoblotting with primary  
185 mouse cardiomyocyte lysate, samples were thawed on ice, combined 1:1 with 2x LSB,  
186 and heated to 65°C for 10 min. Samples were separated on acrylamide gels and  
187 immunoblotting performed as described previously [25]. Quantification of target  
188 protein expression was performed via densitometry and normalised against GAPDH.

189

## 190 **Antibodies**

191 Anti-pan Akt (#2920), anti-phospho S473 Akt (#4058), anti-ERK1/2 (#9102),  
192 anti-phospho ERK1/2 (#9106) were from Cell Signalling (Danvers, Massachusetts,  
193 USA). Anti-Sx4 (#110042) and Anti-SNAP23 (#111202) were from Synaptic Systems  
194 (Goettingen, Germany). Anti-GLUT1 (#652) and anti-GLUT4 (654) were from AbCam  
195 (Cambridge, United Kingdom) and anti-GAPDH (#4300) was from Ambion (Foster city,  
196 California, USA). Detection antibodies were from LI-COR Biosciences (Lincoln,  
197 Nebraska, USA).

198

## 199 **[<sup>3</sup>H]-2-deoxyglucose uptake assay**

200 Prior to performing this assay 3T3-L1 adipocytes and iPSC-CM on 96-well  
201 plates were incubated in serum free medium (DMEM) for 2-4 hours. Cells were then  
202 transferred onto hotplates (maintained at 37°C) and washed twice in Krebs Ringer  
203 Phosphate (KRP) buffer (128 mM NaCl, 4.7 mM KCl, 5 mM NaH<sub>2</sub>PO<sub>4</sub>, 1.25 mM  
204 MgSO<sub>4</sub>, 1.25 mM CaCl<sub>2</sub>). Subsequently, cells were maintained in KRP +/- 860 nM  
205 insulin for 20 min, prior to the addition of [<sup>3</sup>H]-2-deoxyglucose (50 μM 2-deoxyglucose  
206 and 0.4 μCi [<sup>3</sup>H]-2-deoxyglucose). Parallel incubations in the presence of 40 μM  
207 cytochalasin B were performed to account for non-specific association of isotope with  
208 the cells. All values reported have been corrected for this.

209 For assays using the selective GLUT inhibitor BAY-876 [26] (Sigma), cells were  
210 incubated with this compound at the concentrations shown for 20 min prior to the  
211 addition of the assay mix. Where iPSC-CM were treated with blebbistatin (AbCam),  
212 which prevents myocyte contractile activity via inhibition of Myosin ATPase activity,  
213 cells were treated with the specified concentration for approximately 3 hours prior to  
214 and throughout the assay.

215

## 216 **Statistical analysis**

217 Statistical testing was performed with GraphPad Prism 7. Where appropriate,  
218 the relevant statistical test that was implemented is reported, but in general this was  
219 an unpaired t-test, or a 1 or 2 way ANOVA. The level of significance was set at P=0.05.

220

## 221 **Results**

### 222 **iPSC-CM express core elements required for insulin** 223 **stimulated glucose uptake**

224 In order to gain an overview of the machinery present in iPSC-CM,  
225 immunoblotting was used to determine the presence or absence of proteins that are  
226 essential in mediating insulin stimulated GLUT4 trafficking. As can be observed in Fig  
227 1, the insulin signalling intermediates Akt (Protein kinase B) and ERK1/2 (MAPK  
228 42/44) were expressed and both capable of exhibiting insulin-stimulated

229 phosphorylation. Akt is a central factor in insulin-stimulated glucose transport [11], and  
230 there is strong evidence implicating ERK1/2 kinases in the regulation of glucose  
231 uptake in human muscle [27]. Additionally, both of the plasma membrane t-SNAREs  
232 known to mediate the fusion of GLUT4-containing vesicles with the surface of  
233 adipocytes and myocytes, Syntaxin 4 and SNAP23, are expressed in these cells (data  
234 not shown).

235

236 **Fig 1. Key insulin signalling intermediates are present in iPSC-CM.** Protein  
237 lysates were generated from iPSC-CM and subjected to SDS-PAGE and  
238 immunoblotting. Lysates were incubated with antibodies probing for the expression of  
239 total ERK1/2 (1:2000, 3% BSA, TBS-T), phospho-ERK1/2 (1:1000, 3% BSA, TBS-T),  
240 total Akt (1:2000, 3% BSA, TBS-T), and phospho-Akt (ser473, 1:1000, 3% BSA, TBS-  
241 T). For Akt, lysate generated from approximately 50,000 CDI iPSC-CM was loaded  
242 per lane. This experiment was repeated in Axiogenesis iPSC-CM, with at least 3  
243 independent replicates for each cell type. For ERK1/2, lysate generated from  
244 approximately 20,000 Axiogenesis iPSC-CM was loaded per lane. This experiment  
245 was performed with Axiogenesis iPSC-CM only, and repeated with 3 independent  
246 samples. Where indicated cells were stimulated with 860 nM porcine insulin for 30 min  
247 prior to lysis. The approximate position of molecular weight markers are indicated. Bas  
248 = basal, unstimulated; Ins = insulin stimulated.

249

## 250 **iPSC-CM do not exhibit insulin stimulated glucose uptake**

251 2-deoxy-D-glucose uptake assays were optimised for cells on a 96-well plate  
252 format. As shown in Fig. 2, a clear basal signal and subsequent insulin response could  
253 be detected from both 3T3-L1 adipocytes and isolated primary rabbit cardiomyocytes.  
254 However, insulin failed to significantly increase glucose uptake in iPSC-CM (Fig. 2).  
255 The data presented is from a single commercial source of cells, however similar results  
256 were obtained from iPSC-CM from a second independent supplier (Supplemental fig  
257 1).

258

259 **Fig 2. Insulin stimulated [<sup>3</sup>H]-2-deoxyglucose uptake in iPSC-CM, 3T3-L1**  
260 **adipocytes, and primary adult cardiomyocytes.** Background corrected [<sup>3</sup>H]-2-  
261 deoxyglucose uptake is displayed from several cell types, generated via the protocol  
262 detailed in the methods. 3T3-L1 adipocytes and CDI iPSC-CM were serum starved for  
263 4 hours prior to the assay, insulin stimulated for 20 min, and incubated with [<sup>3</sup>H]-2-  
264 deoxyglucose assay mix for 10 min. Primary adult rabbit septal cardiomyocytes were  
265 assayed 3 hours post plating, insulin stimulated for 20 min, and incubated with [<sup>3</sup>H]-2-  
266 deoxyglucose assay mix for 20 min. Data is displayed as the mean (+ S.E.M) fold  
267 change in uptake relative to basal values from 3 (iPSC-CM and 3T3-L1 adipocytes) or  
268 7 (cardiomyocytes) individual experiments. Basal values corresponded to an average  
269 of 1311 CPM (rabbit cardiomyocytes), 3167 CPM (3T3-L1 adipocytes), or 2229 CPM  
270 (iPSC-CM) respectively, per well of a 96-well plate. Statistical testing was performed  
271 with an unpaired t-test on raw unadjusted data. \* indicates P<0.05.

272

## 273 **Contraction is a key regulator of glucose uptake in iPSC-CM**

274 In addition to insulin, contraction is a potent stimulus to initiate GLUT4  
275 translocation to the plasma membrane and therefore also increase cellular glucose  
276 uptake [28]. Whilst insulin-stimulated glucose uptake can be recorded in contracting  
277 myocardium, this response is considerably less powerful than that recorded from  
278 quiescent isolated cardiomyocytes [29,30]. It was considered possible that the  
279 spontaneous contractile activity of iPSC-CM could potentially be masking a small yet  
280 significant insulin response. In order to assess this possibility basal and insulin  
281 stimulated glucose uptake were recorded in iPSC-CM in the presence and absence of  
282 blebbistatin. Inhibition of contraction via this method resulted in a significant reduction  
283 in iPSC-CM glucose uptake by >50%, in the presence or absence of insulin (Fig. 3).  
284 However, regardless of whether cells were contracting or not, insulin failed to  
285 significantly increase glucose uptake. This suggests that whilst contraction is  
286 undoubtedly a critical regulator of metabolic demand and therefore substrate uptake  
287 in iPSC-CM, it does not interfere with any metabolic regulation of these cells by insulin.

288

289 **Fig 3. Glucose uptake in quiescent iPSC-CM.** Cells were incubated with 3-10  $\mu$ M  
290 blebbistatin for 3 hours prior to and throughout the measurement of [ $^3$ H]-2-  
291 deoxyglucose uptake in iPSC-CM. Cells were stimulated with 860 nM porcine insulin  
292 prior to incubation with [ $^3$ H]-2-deoxyglucose assay mix. Data is displayed as the mean  
293 (+S.E.M.) percentage difference in uptake relative to basal values from 3 individual  
294 experiments. Statistical testing was performed with a 2-way ANOVA on raw  
295 unadjusted data. \* indicates  $P < 0.05$ .

296

## 297 **iPSC-CM do not express GLUT4**

298 Whilst there are numerous proteins and interactions responsible for the  
299 regulated trafficking of GLUT4, ultimately one of the foundational requirements to  
300 facilitate this process is sufficient expression of GLUT4 itself. *In vivo*, cardiac GLUT1  
301 expression predominates during early development prior to a metabolic switch and  
302 rapid induction of GLUT4 protein during early post-natal life with a corresponding  
303 repression of GLUT1 [31]. Given the generally reported classification of iPSC-CM as  
304 foetal like cardiomyocytes due to aspects of their electrophysiological and structural  
305 phenotype, it could be that these cells express the non-insulin sensitive GLUT1  
306 transporter in favour of GLUT4.

307 Therefore, quantification of GLUT1 and GLUT4 was performed in iPSC-CM and  
308 the primary adult cardiomyocytes they are claimed to represent, by using 3T3-L1  
309 adipocytes as a reference. Quantified expression of each transporter in this cell type  
310 has been published previously, with an estimated 950,000 and 280,000 copies of Glut  
311 1 and 4, respectively, per cell [32]. As shown in Fig. 4 and Table 1, by comparing the  
312 expression of GLUT4 normalised against GAPDH (loading control) in each source of  
313 cardiomyocytes against the signals obtained from 3T3-L1 adipocytes, our data  
314 suggest that iPSC-CM express approximately 8-fold less GLUT4 than primary adult



315 cardiomyocytes. In contrast, completion of identical analysis for GLUT1 (Fig. 5)  
316 revealed iPSC-CM to express approximately 30-fold more of this transporter, relative  
317 to primary cardiomyocytes.

318

319 **Fig 4. GLUT4 protein expression in different cardiomyocyte models.** Protein  
320 lysates generated from 3T3-L1 adipocytes, primary adult mouse cardiomyocytes, and  
321 iPSC-CM were subjected to SDS-PAGE and immunoblotting. Lysates were incubated  
322 with antibodies probing for GLUT4 (1:2000, 1% milk, PBS-T) and GAPDH (1:80,000,  
323 1% milk, PBS-T). Two different amounts of each sample of cardiomyocyte lysate from  
324 three biologically independent sources were loaded, in addition to at least three  
325 samples of 3T3-L1 adipocyte lysate. For each cell type, 1x refers to lysate generated  
326 from approximately 15,000 (3T3-L1 adipocytes) or 17,500 (iPSC-CM) cells, or  
327 approximately 20  $\mu$ g of protein (mouse cardiomyocytes). Panel A compares 3T3-L1  
328 adipocytes and iPSC-CMs; Panel B compares 3T3-L1 adipocytes and primary mouse  
329 cardiomyocytes.

330

331 **Fig 5. GLUT1 protein expression in different cardiomyocyte models.** Protein  
332 lysates generated from 3T3-L1 adipocytes, primary adult mouse cardiomyocytes, and  
333 iPSC-CM were subjected to SDS-PAGE and immunoblotting. Lysates were incubated  
334 with antibodies probing for GLUT1 (1:1000, 1% milk, PBS-T) and GAPDH (1:80,000,  
335 1% milk, PBS-T). Two different amounts of each sample of cardiomyocyte lysate from  
336 three biologically independent sources were loaded, in addition to at least three  
337 samples of 3T3-L1 adipocyte lysate. For each cell type, 1x refers to lysate generated  
338 from approximately 15,000 (3T3-L1 adipocytes panel A), 17,500 (iPSC-CM), or 45,000  
339 (3T3-L1 adipocytes panel B) cells, or approximately 20  $\mu$ g of protein (mouse  
340 cardiomyocytes). Panel A compares 3T3-L1 adipocytes and iPSC-CMs; Panel B  
341 compares 3T3-L1 adipocytes and primary mouse cardiomyocytes.

342

343 **Table 1. Quantification of GLUT1 and GLUT4 protein expression in different**  
344 **cardiomyocyte models.**

| Cell Type         | Ave. Fold Difference GLUT1 | Estimated Amount GLUT1 (ng/1.5 mg total protein) | Ave. Fold Difference GLUT4 | Estimated Amount GLUT4 (ng/1.5 mg total protein) |
|-------------------|----------------------------|--------------------------------------------------|----------------------------|--------------------------------------------------|
| 3T3-L1 Adipocytes | 1                          | 215                                              | 1                          | 45                                               |
| iPSC-CM           | 5.1 fold higher            | 1106                                             | 3.1 fold lower             | 14.6                                             |

|                  |                |      |                 |       |
|------------------|----------------|------|-----------------|-------|
| Primary Mouse CM | 5.7 fold lower | 37.5 | 2.7 fold higher | 121.4 |
|------------------|----------------|------|-----------------|-------|

345 Quantification of target protein expression was performed via densitometry and  
346 normalised against GAPDH to account for differences in loading. Estimates for  
347 differences in absolute GLUT expression were generated by calculation of the fold  
348 difference between cardiomyocyte lysates and 3T3-L1 adipocytes across 2 replicate  
349 immunoblots.

350

351 In order to gain further insight beyond this protein expression data, the effect of  
352 GLUT1 and GLUT4 inhibition upon iPSC-CM glucose transport was assessed. In  
353 order to achieve this the drug BAY-876 was utilised. BAY-876 inhibits GLUT1 with an  
354 IC<sub>50</sub> of 2 nM, and inhibits GLUT4 with an IC<sub>50</sub> of 200 nM [26]. In three independent  
355 experiments, BAY-876 inhibition of GLUT1 (20 nM) significantly ( $P < 0.05$ ) reduced  
356 [<sup>3</sup>H]-2-deoxyglucose uptake into 3T3-L1 adipocytes in the presence or absence of  
357 insulin by approximately 25% (Fig. 6). Increasing the concentration of BAY-876 to 2  
358 μM resulted in a further significant ( $P < 0.05$ ) reduction in uptake values to almost no  
359 detectable signal. This strongly suggests that in this cell type GLUT4 is predominantly  
360 responsible for regulating glucose uptake, both under basal and insulin stimulated  
361 conditions. It is particularly striking that a significant insulin response was only not  
362 recorded ( $P > 0.05$ ) in the presence of 2 μM BAY-876. Inhibition of the action of GLUT1  
363 in iPSC-CM produced a larger (~50%) significant ( $P < 0.05$ ) decrease in [<sup>3</sup>H]-2-  
364 deoxyglucose uptake (Fig. 6). Furthermore, in contrast to 3T3-L1 adipocytes,  
365 increasing the concentration of BAY-876 to 2 μM had no significant ( $P > 0.05$ ) additional  
366 effect upon transport values. These results indicate that iPSC-CM do not rely upon  
367 GLUT4 for the regulation of cellular glucose uptake and are more heavily dependent  
368 upon GLUT1.

369

370 **Fig 6. Functional contribution of GLUT1 and GLUT4 to the regulation of cellular**  
371 **glucose uptake in iPSC-CM and 3T3-L1 adipocytes.** A: Background corrected basal  
372 and insulin stimulated [<sup>3</sup>H]-2-deoxyglucose uptake was assayed in 3T3-L1 adipocytes  
373 incubated with 0 [DMSO only], 200 nM or 2 μM BAY-876. Cells were serum starved  
374 for 4 hours prior to the assay, incubated with BAY +/- 860 nM insulin for 20 min, and  
375 then incubated with the [<sup>3</sup>H]-2-deoxyglucose assay mix for 10 min. Data presented is  
376 mean (+S.E.M.) uptake from 3 individual experiments. Statistical analysis was  
377 performed with a 2-way ANOVA on raw unadjusted data, and the level of significance  
378 was set at  $P = 0.05$ . B: The same data in panel A presented as the mean (+S.E.M.)  
379 percentage difference in values between each experimental group and control basal  
380 or control insulin, as appropriate. C: Background corrected basal [<sup>3</sup>H]-2-deoxyglucose  
381 uptake was recorded from iPSC-CM that were incubated with 0 [DMSO only], 200 nM  
382 or 2 μM BAY-876 and is presented as percentage difference from control. Data are  
383 mean (+S.E.M.) uptake for each condition from 3 individual experiments. Statistical

384 analysis was performed with a 2-way ANOVA on raw unadjusted data, and the level  
385 of significance was set at P=0.05.

386

## 387 **Attempts to increase iPSC-CM GLUT4 expression**

388 In response to identification of low levels of GLUT4 protein expression in iPSC-  
389 CM, several interventions designed to rectify this situation were implemented. During  
390 foetal cardiac development there are high levels of GLUT1 and low levels of GLUT4,  
391 however this quickly reverses during early postnatal life. The induction of experimental  
392 hypothyroidism was found to prevent this switch, thereby implicating the active form  
393 of thyroid hormone tri-iodothyronine (T<sub>3</sub>) in the perinatal regulation of cardiac GLUT4  
394 expression [31]. T<sub>3</sub> has also been used previously in order to induce maturation of  
395 other aspects of iPSC-CM physiology, with reported success [33]. Therefore, within  
396 the present study iPSC-CM were maintained in medium supplemented with a range  
397 of physiologically relevant concentrations of T<sub>3</sub>. However, this failed to significantly  
398 alter iPSC-CM GLUT4 expression (supplemental Fig. 2).

399 Similarly, maturation medium conditioning was implemented, whereby iPSC-  
400 CM were maintained in medium containing no or low (1g/L) levels of glucose and were  
401 instead forced to rely upon fatty acid metabolism to support ATP regeneration as  
402 would be required *in vivo* [23]. However, this resulted in only a modest, non-significant  
403 (P>0.05) increase in GLUT4 expression that was overshadowed but a much greater  
404 increase in GLUT1 expression (Table 2). This is indicative of a general upregulation  
405 of GLUT transporters in response to glucose deprivation, rather than evidence of a  
406 specific metabolic maturation effect. Equally, most cell types are highly sensitive to  
407 and interact with their environment yet maintaining iPSC-CM for a longer period of  
408 time than typically recommended in culture, or in an alternative culture vessel (12 or  
409 24 well plate), had limited impact upon GLUT4 protein expression (data not shown). It  
410 was thought that these latter interventions may alter the contractile profile of the cells,  
411 which based upon skeletal muscle based studies should act as a stimulus for  
412 regulating GLUT4 expression [34].

413

414 **Table 2. Effect of maturation medium conditioning upon iPSC-CM GLUT1 and**  
415 **GLUT4 protein expression.**

| Intervention                         | Components                                             | Ave. Fold change GLUT1 | Ave. Fold change GLUT4 |
|--------------------------------------|--------------------------------------------------------|------------------------|------------------------|
| <b>Maturation Medium Condition 1</b> | 0 mM glucose<br>1x ITS supplement<br>860 nM insulin    | 3.6 fold increase      | 1.4 fold increase      |
| <b>Maturation Medium Condition 2</b> | 5.5 mM glucose<br>1 x ITS supplement<br>860 nM insulin | 1.8 fold increase      | 0.1 fold decrease      |

|                                      |                                                |                   |                   |
|--------------------------------------|------------------------------------------------|-------------------|-------------------|
| <b>Maturation Medium Condition 3</b> | 0 mM glucose<br>10% serum<br>172 nM insulin    | 6.9 fold increase | 1.8 fold increase |
| <b>Maturation Medium Condition 4</b> | 5.5 mM glucose<br>10% serum<br>172 nM insulin  | 4.3 fold increase | 1.2 fold increase |
| <b>Maturation Medium Condition 5</b> | 0 mM glucose<br>10% serum<br>17.2 nM insulin   | 7.9 fold increase | 1.7 fold increase |
| <b>Maturation Medium Condition 6</b> | 5.5 mM glucose<br>10% serum<br>17.2 nM insulin | 3.5 fold increase | 1.2 fold increase |
| <b>Maturation Medium Condition 7</b> | 0 mM glucose<br>10% serum<br>0 nM insulin      | 7.7 fold increase | 1.7 fold increase |
| <b>Maturation Medium Condition 8</b> | 5.5 mM glucose<br>10% serum<br>0 nM insulin    | 7.2 fold increase | 1.5 fold increase |

416 Axiogenesis iPSC-CM were maintained in 8 distinct variations of ‘maturation medium’  
417 for 4 days after an initial 3 day recovery period post-plating. All cells were maintained  
418 in Dulbecco’s modified eagle medium supplemented with 10 mM HEPES, 2 mM  
419 Carnitine, 5 mM Creatine, 5 mM Taurine, 1x non-essential amino acid supplement  
420 (ThermoFisher), and 1x linoleic-oleic acid supplement (Sigma). Additional  
421 supplements that defined the separate conditions are displayed under ‘components’.  
422 GLUT1 and GLUT4 protein expression in iPSC-CM maintained in each of the  
423 conditions and control cells was assessed via immunoblotting. Quantification of target  
424 protein expression was performed via densitometry and normalised against GAPDH.  
425 The data displayed is the mean fold difference in protein expression relative to  
426 untreated control cells, generated across 3 independent experiments.

427

## 428 Discussion

429 The overarching aim of this study was to assess the potential of iPSC-CM to  
430 act as the basis of a novel cellular model of DCM. Primarily, in order to be considered  
431 viable candidates, iPSC-CM must exhibit a reproducible and robust insulin-stimulated

432 glucose uptake response. Initial data suggested that this may be possible, based upon  
433 the observation that iPSC-CM express and can activate molecules such as Akt and  
434 ERK1/2, indicating that key insulin signalling machinery to intermediates involved in  
435 stimulating glucose transport are intact. However, we were unable to demonstrate  
436 insulin-stimulated glucose transport in iPSC-CMs. A central feature of diabetic  
437 physiology is insulin resistance in glucose metabolism. As these cells do not exhibit  
438 an insulin response, their utility as a model for DCM must be viewed with caution [23].  
439 This conclusion was reached using cells obtained from 2 separate commercial  
440 sources, suggesting that this is not likely to be a limitation unique to iPSC-CM  
441 generated from one specific manufacturer.

442 The wider implications of this dataset for the capacity of iPSC-CM to be used  
443 for disease modelling will vary. There are 2 broad approaches to mimicking a disease  
444 phenotype with this cell type *in vitro*. First of all, external factors designed to replicate  
445 the *in vivo* pathological stimuli may be applied to culture medium and incubated for a  
446 sufficient duration in order to induce the desired phenotype. When considering the  
447 general importance of metabolism in cellular physiology and phenotype, it could be  
448 argued that any model generated via this approach will be of limited clinical relevance.  
449 This metabolic limitation is compounded by additional well characterised limitations in  
450 iPSC-CM structure and function. In contrast, several studies have reported the  
451 spontaneous recapitulation of electrophysiological defects in iPSC-CM generated from  
452 patients with known genetic mutations [35,36]. In this instance, when considering a  
453 defined pathophysiological process with a clear origin, it could be argued that the  
454 poorly representative metabolic phenotype of iPSC-CM (relative to primary  
455 cardiomyocytes) may be of lesser importance. However, a key component of drug  
456 development is assessment of toxicity, therefore there must be an awareness that  
457 iPSC-CM may fail to detect or misrepresent off-target pharmacological effects upon  
458 metabolic parameters.

459 Quantification of GLUT1 and GLUT4 transporter levels in iPSC-CM provided a  
460 potential explanation as to why no insulin stimulated glucose uptake response was  
461 recorded from these cells. Current understanding is that GLUT4 is the main insulin  
462 sensitive glucose transporter [37], therefore very low expression would be expected  
463 to limit any insulin response. In contrast GLUT1 is thought to exhibit only a very small  
464 degree of insulin sensitivity, achieved via increased general endosomal recycling to  
465 the plasma membrane [30]. Consistent with this, Figs.4 and 5 confirms low levels of  
466 GLUT4 and high levels of GLUT1 in iPSC-CMs compared to both 3T3-L1 adipocytes  
467 and rabbit primary cardiomyocytes. The results of this study also provide new insight  
468 into levels of expression of GLUT4 and GLUT1 between these major insulin target  
469 tissues. Data obtained using the GLUT-selective inhibitor BAY-876 supports the  
470 conclusions drawn regarding the relative functional importance of GLUT1 and GLUT4  
471 in iPSC-CM. In stark contrast to the GLUT4 dependent clear insulin response of 3T3-  
472 L1 adipocytes, inhibition of GLUT4 in iPSC-CM had no impact upon 2-deoxyglucose  
473 transport. This observation, coupled with the much stronger effect of inhibiting the  
474 action of GLUT1 in this cell type, strengthens the suggestion that iPSC-CM may exhibit

475 expression of GLUT transporters (and general physiology) analogous to foetal  
476 cardiomyocytes. Additionally, it is of interest that inhibition of the action of GLUT1 and  
477 GLUT4 in iPSC-CM only reduced 2-deoxyglucose uptake by approximately 50%, in  
478 contrast to 3T3-L1 adipocytes whereby all uptake was essentially abolished. This  
479 might suggest that other glucose transporters not classically associated with myocytes  
480 may be substantially present in this cell type with notable functional effect.

481 One intriguing theory that arises from this dataset is that iPSC-CM are already  
482 insulin resistant in their baseline condition. This is strengthened by the manufacturer's  
483 recommendation (as for multiple cell lines) that cells are maintained in medium  
484 containing high levels of glucose (4.5 g/L or approx. 25 mM). However, the  
485 overwhelming reliance upon and strong expression levels of GLUT1 in this cell type  
486 more readily suggests that iPSC-CM are indeed just at an earlier stage of cardiac  
487 development than adult cells. Therefore, several interventions based upon prior iPSC-  
488 CM literature were implemented in an attempt to metabolically mature these cells.  
489 However, the results were not indicative of any success. This suggests that whilst  
490 simple 2D cell culture approaches are suitable for the differentiation of iPSC-CM, a  
491 more advanced approach that better replicates the combination of mechanical,  
492 hormonal and metabolic stimuli the heart is exposed to *in vivo* may be required to  
493 enhance the maturation of this cell type towards a more clinically relevant cardiac  
494 model. Accordingly, the most recent advances in this field have employed novel  
495 methods, whereby iPSC-CM were used to form a section of cardiac like tissue and  
496 stretched between two termini, allowing simultaneous regulation of loading and  
497 contractile mechanics [38]. Alternatively, more direct (but less physiologically relevant)  
498 molecular methods could be employed to enhance iPSC-CM GLUT4 protein  
499 expression. Alterations in metabolic parameters could realistically drive maturation of  
500 other aspects of cellular physiology.

501

## 502 **Conclusion**

503 Overall, we suggest that iPSC-CM are not suitable for use as the basis of a novel  
504 cellular model of DCM, due to their lack of insulin stimulated glucose uptake response.  
505 This appears to be primarily the result of an immature metabolic phenotype,  
506 characterised by a lack of protein expression of the insulin sensitive GLUT4  
507 transporter. Initial attempts to increase iPSC-CM GLUT4 expression were  
508 unsuccessful. Development of methods to enhance GLUT4 expression might help  
509 realise the significant potential of iPSC-CMs.

## 510 **Acknowledgements**

511 This work as supported by a PhD scholarship (FS/14/61/31284) and project grant  
512 (PG/18/47/33822) from The British Heart Foundation. Work in GWGs laboratory is  
513 supported by grants from Diabetes UK (15/0005246 and 13/0004696). We thank  
514 Aileen Rankin for supplying primary cardiomyocytes, Anna Koester and Rachel  
515 Livingstone for helpful discussions and Laura Stirrat for expert technical assistance.

516

## 517 References

- 518 1. Kannel WB, Hjortland M, Castelli WP. Role of diabetes in congestive heart  
519 failure: the Framingham study. *Am J Cardiol.* 1974 Jul;34(1):29–34.
- 520 2. Boyer JK, Thanigaraj S, Schechtman KB, Pérez JE. Prevalence of ventricular  
521 diastolic dysfunction in asymptomatic, normotensive patients with diabetes  
522 mellitus. *Am J Cardiol.* 2004 Apr 1;93(7):870–5.
- 523 3. Zahiti BF, Gorani DR, Gashi FB, Gjoka SB, Zahiti LB, Haxhiu BS, et al. Left  
524 ventricular diastolic dysfunction in asymptomatic type 2 diabetic patients:  
525 detection and evaluation by tissue Doppler imaging. *Acta Inform Med.*  
526 2013;21(2):120–3.
- 527 4. Poulsen MK, Henriksen JE, Dahl J, Johansen A, Gerke O, Vach W, et al. Left  
528 Ventricular Diastolic Function in Type 2 Diabetes Mellitus Prevalence and  
529 Association With Myocardial and Vascular Disease. 2010;
- 530 5. Shang Y, Zhang X, Chen L, Leng W, Lei X, Yang Q, et al. Assessment of Left  
531 Ventricular Structural Remodelling in Patients with Diabetic Cardiomyopathy  
532 by Cardiovascular Magnetic Resonance. *J Diabetes Res.* 2016 Jun  
533 22;2016:1–8.
- 534 6. Huynh K, McMullen JR, Julius TL, Tan JW, Love JE, Cemerlang N, et al.  
535 Cardiac-specific IGF-1 receptor transgenic expression protects against cardiac  
536 fibrosis and diastolic dysfunction in a mouse model of diabetic  
537 cardiomyopathy. *Diabetes.* 2010 Jun 9;59(6):1512–20.
- 538 7. Schannwell CM, Schneppenheim M, Perings S, Plehn G, Strauer BE. Left  
539 Ventricular Diastolic Dysfunction as an Early Manifestation of Diabetic  
540 Cardiomyopathy. *Cardiology.* 2002;98(1–2):33–9.
- 541 8. Kobayashi K, Forte TM, Taniguchi S, Ishida BY, Oka K, Chan L. The db/db  
542 mouse, a model for diabetic dyslipidemia: molecular characterization and  
543 effects of Western diet feeding. *Metabolism.* 2000 Jan;49(1):22–31.
- 544 9. Belke DD, Swanson EA, Dillmann WH. Decreased sarcoplasmic reticulum  
545 activity and contractility in diabetic db/db mouse heart. *Diabetes.* 2004  
546 Dec;53(12):3201–8.
- 547 10. Stølen TO, Høydal MA, Kemi OJ, Catalucci D, Ceci M, Aasum E, et al. Interval  
548 Training Normalizes Cardiomyocyte Function, Diastolic Ca<sup>2+</sup> Control, and SR  
549 Ca<sup>2+</sup> Release Synchronicity in a Mouse Model of Diabetic Cardiomyopathy.  
550 *Circ Res.* 2009 Sep 11;105(6):527–36.
- 551 11. Leto D, Saltiel AR. Regulation of glucose transport by insulin: traffic control of  
552 GLUT4. *Nat Rev Mol Cell Biol.* 2012 Jun 1;13(6):383–96.
- 553 12. Peterson LR, Herrero P, Schechtman KB, Racette SB, Waggoner AD,  
554 Kisrieva-Ware Z, et al. Effect of Obesity and Insulin Resistance on Myocardial  
555 Substrate Metabolism and Efficiency in Young Women. *Circulation.* 2004 May  
556 11;109(18):2191–6.
- 557 13. Scheuermann-Freestone M, Madsen PL, Manners D, Blamire AM,  
558 Buckingham RE, Styles P, et al. Abnormal Cardiac and Skeletal Muscle  
559 Energy Metabolism in Patients With Type 2 Diabetes. *Circulation.* 2003 Jun  
560 24;107(24):3040–6.
- 561 14. Neubauer S, Horn M, Cramer M, Harre K, Newell JB, Peters W, et al.  
562 Myocardial Phosphocreatine-to-ATP Ratio Is a Predictor of Mortality in  
563 Patients With Dilated Cardiomyopathy. *Circulation.* 1997 Oct 7;96(7):2190–6.
- 564 15. Belke DD, Larsen TS, Gibbs EM, Severson DL. Altered metabolism causes  
565 cardiac dysfunction in perfused hearts from diabetic ( *db / db* ) mice. *Am J*

- 566 Physiol Metab. 2000 Nov;279(5):E1104–13.
- 567 16. Semeniuk LM, Kryski AJ, Severson DL. Echocardiographic assessment of  
568 cardiac function in diabetic *db/db* and transgenic *db/db*-hGLUT4 mice. *Am J*  
569 *Physiol Circ Physiol*. 2002 Sep;283(3):H976–82.
- 570 17. Boudina S, Bugger H, Sena S, O'Neill BT, Zaha VG, Ilkun O, et al.  
571 Contribution of Impaired Myocardial Insulin Signaling to Mitochondrial  
572 Dysfunction and Oxidative Stress in the Heart. *Circulation*. 2009 Mar  
573 10;119(9):1272–83.
- 574 18. Takahashi K, Tanabe K, Ohnuki M, Narita M, Ichisaka T, Tomoda K, et al.  
575 Induction of Pluripotent Stem Cells from Adult Human Fibroblasts by Defined  
576 Factors. *Cell*. 2007 Nov 30;131(5):861–72.
- 577 19. Hwang HS, Kryshtal DO, Feaster TK, Sánchez-Freire V, Zhang J, Kamp TJ, et  
578 al. Comparable calcium handling of human iPSC-derived cardiomyocytes  
579 generated by multiple laboratories. *J Mol Cell Cardiol*. 2015 Aug 1;85:79–88.
- 580 20. Lee Y-K, Ng K-M, Lai W-H, Chan Y-C, Lau Y-M, Lian Q, et al. Calcium  
581 homeostasis in human induced pluripotent stem cell-derived cardiomyocytes.  
582 *Stem Cell Rev*. 2011 Nov;7(4):976–86.
- 583 21. Pioner JM, Racca AW, Klaiman JM, Yang K-C, Guan X, Pabon L, et al.  
584 Isolation and Mechanical Measurements of Myofibrils from Human Induced  
585 Pluripotent Stem Cell-Derived Cardiomyocytes. *Stem Cell Reports*. 2016 Jun  
586 14;6(6):885–96.
- 587 22. Kolanowski TJ, Antos CL, Guan K. Making human cardiomyocytes up to date:  
588 Derivation, maturation state and perspectives. *Int J Cardiol*. 2017 Aug  
589 15;241:379–86.
- 590 23. Drawnel FM, Boccardo S, Prummer M, Delobel F, Graff A, Weber M, et al.  
591 Disease Modeling and Phenotypic Drug Screening for Diabetic  
592 Cardiomyopathy using Human Induced Pluripotent Stem Cells. *Cell Rep*. 2014  
593 Nov 6;9(3):810–20.
- 594 24. Correia C, Koshkin A, Duarte P, Hu D, Teixeira A, Domian I, et al. Distinct  
595 carbon sources affect structural and functional maturation of cardiomyocytes  
596 derived from human pluripotent stem cells. *Sci Rep*. 2017 Dec 17;7(1):8590.
- 597 25. Sadler JBA, Bryant NJ, Gould GW. Characterization of VAMP isoforms in 3T3-  
598 L1 adipocytes: implications for GLUT4 trafficking. Brenwald PJ, editor. *Mol*  
599 *Biol Cell*. 2015 Feb 1;26(3):530–6.
- 600 26. Siebeneicher H, Cleve A, Rehwinkel H, Neuhaus R, Heisler I, Müller T, et al.  
601 Identification and Optimization of the First Highly Selective GLUT1 Inhibitor  
602 BAY-876. *ChemMedChem*. 2016 Oct 19;11(20):2261–71.
- 603 27. Rajkhowa M, Brett S, Cuthbertson DJ, Lipina C, Ruiz-Alcaraz AJ, Thomas GE,  
604 et al. Insulin resistance in polycystic ovary syndrome is associated with  
605 defective regulation of ERK1/2 by insulin in skeletal muscle in vivo. *Biochem J*.  
606 2009;418:665–71.
- 607 28. Kramer HF, Witczak CA, Taylor EB, Fujii N, Hirshman MF, Goodyear LJ.  
608 AS160 regulates insulin- and contraction-stimulated glucose uptake in mouse  
609 skeletal muscle. *J Biol Chem*. 2006 Oct 20;281(42):31478–85.
- 610 29. Graveleau C, Zaha VG, Mohajer A, Banerjee RR, Dudley-Rucker N, Steppan  
611 CM, et al. Mouse and human resistins impair glucose transport in primary  
612 mouse cardiomyocytes, and oligomerization is required for this biological  
613 action. *J Biol Chem*. 2005 Sep 9;280(36):31679–85.
- 614 30. Fischer Y, Thomas J, Sevilla L, Muñoz P, Becker C, Holman G, et al. Insulin-  
615 induced recruitment of glucose transporter 4 (GLUT4) and GLUT1 in isolated



- 616 rat cardiac myocytes. Evidence of the existence of different intracellular  
617 GLUT4 vesicle populations. *J Biol Chem*. 1997 Mar 14;272(11):7085–92.
- 618 31. Castelló A, Rodríguez-Manzaneque JC, Camps M, Pérez-Castillo A, Testar X,  
619 Palacín M, et al. Perinatal hypothyroidism impairs the normal transition of  
620 GLUT4 and GLUT1 glucose transporters from fetal to neonatal levels in heart  
621 and brown adipose tissue. Evidence for tissue-specific regulation of GLUT4  
622 expression by thyroid hormone. *J Biol Chem*. 1994 Feb 25;269(8):5905–12.
- 623 32. Calderhead DM, Kitagawa K, Tanner LI, Holman GD, Lienhard GE. Insulin  
624 regulation of the two glucose transporters in 3T3-L1 adipocytes. *J Biol Chem*.  
625 1990 Aug 15;265(23):13801–8.
- 626 33. Yang X, Rodriguez M, Pabon L, Fischer KA, Reinecke H, Regnier M, et al. Tri-  
627 iodo-L-thyronine promotes the maturation of human cardiomyocytes-derived  
628 from induced pluripotent stem cells. *J Mol Cell Cardiol*. 2014 Jul 1;72:296–304.
- 629 34. O’Gorman DJ, Karlsson HKR, McQuaid S, Yousif O, Rahman Y, Gasparro D,  
630 et al. Exercise training increases insulin-stimulated glucose disposal and  
631 GLUT4 (SLC2A4) protein content in patients with type 2 diabetes.  
632 *Diabetologia*. 2006 Nov 9;49(12):2983–92.
- 633 35. Carvajal-Vergara X, Sevilla A, D’Souza SL, Ang Y-S, Schaniel C, Lee D-F, et  
634 al. Patient-specific induced pluripotent stem-cell-derived models of LEOPARD  
635 syndrome. *Nature*. 2010 Jun 10;465(7299):808–12.
- 636 36. Itzhaki I, Maizels L, Huber I, Zwi-Dantsis L, Caspi O, Winterstern A, et al.  
637 Modelling the long QT syndrome with induced pluripotent stem cells. *Nature*.  
638 2011 Mar 16;471(7337):225–9.
- 639 37. Bryant NJ, Gould GW. SNARE Proteins Underpin Insulin-Regulated GLUT4  
640 Traffic. *Traffic*. 2011 Jun;12(6):657–64.
- 641 38. Ronaldson-Bouchard K, Ma SP, Yeager K, Chen T, Song L, Sirabella D, et al.  
642 Advanced maturation of human cardiac tissue grown from pluripotent stem  
643 cells. *Nature*. 2018 Apr 4;556(7700):239–43.

644

## 645 Supplemental Figures

646

647 **Supplemental Fig 1. Insulin stimulated [<sup>3</sup>H]-2-deoxyglucose uptake in**  
648 **Axiogenesis iPSC-CM.** Background corrected [<sup>3</sup>H]-2-deoxyglucose uptake was  
649 recorded from iPSC-CM, via the protocol detailed in the methods. Cells were insulin  
650 stimulated for 30 min prior to incubation with [<sup>3</sup>H]-2-deoxyglucose assay mix for 15  
651 min. Data is displayed as the mean (+S.E.M.) fold change in uptake relative to basal  
652 values from 3 representative individual experiments. Statistical testing was performed  
653 with a 2-way ANOVA on raw unadjusted data, and the level of significance was set at  
654 P=0.05.

655

656 **Supplemental Fig 2. GLUT4 protein expression in T<sub>3</sub> treated iPSC-CM.** iPSC-CM  
657 were maintained for 4 days in medium containing 0-13.5 nM T<sub>3</sub> as indicated.  
658 Subsequently, protein lysates were generated and subjected to SDS-PAGE and  
659 immunoblotting. Lysates were incubated with antibodies probing for GLUT4 (1:2000,  
660 1% milk, PBS-T) and GAPDH (1:80,000, 1% milk, PBS-T). Quantification was  
661 performed via densitometry and the mean (+S.E.M.) expression of GLUT4 (normalised

662 to GAPDH) relative to control for each condition across 3 independent experiments is  
663 displayed. Statistical analysis was performed on unadjusted data with a 1-way  
664 ANOVA, and the level of significance was set at  $P=0.05$ .  
665

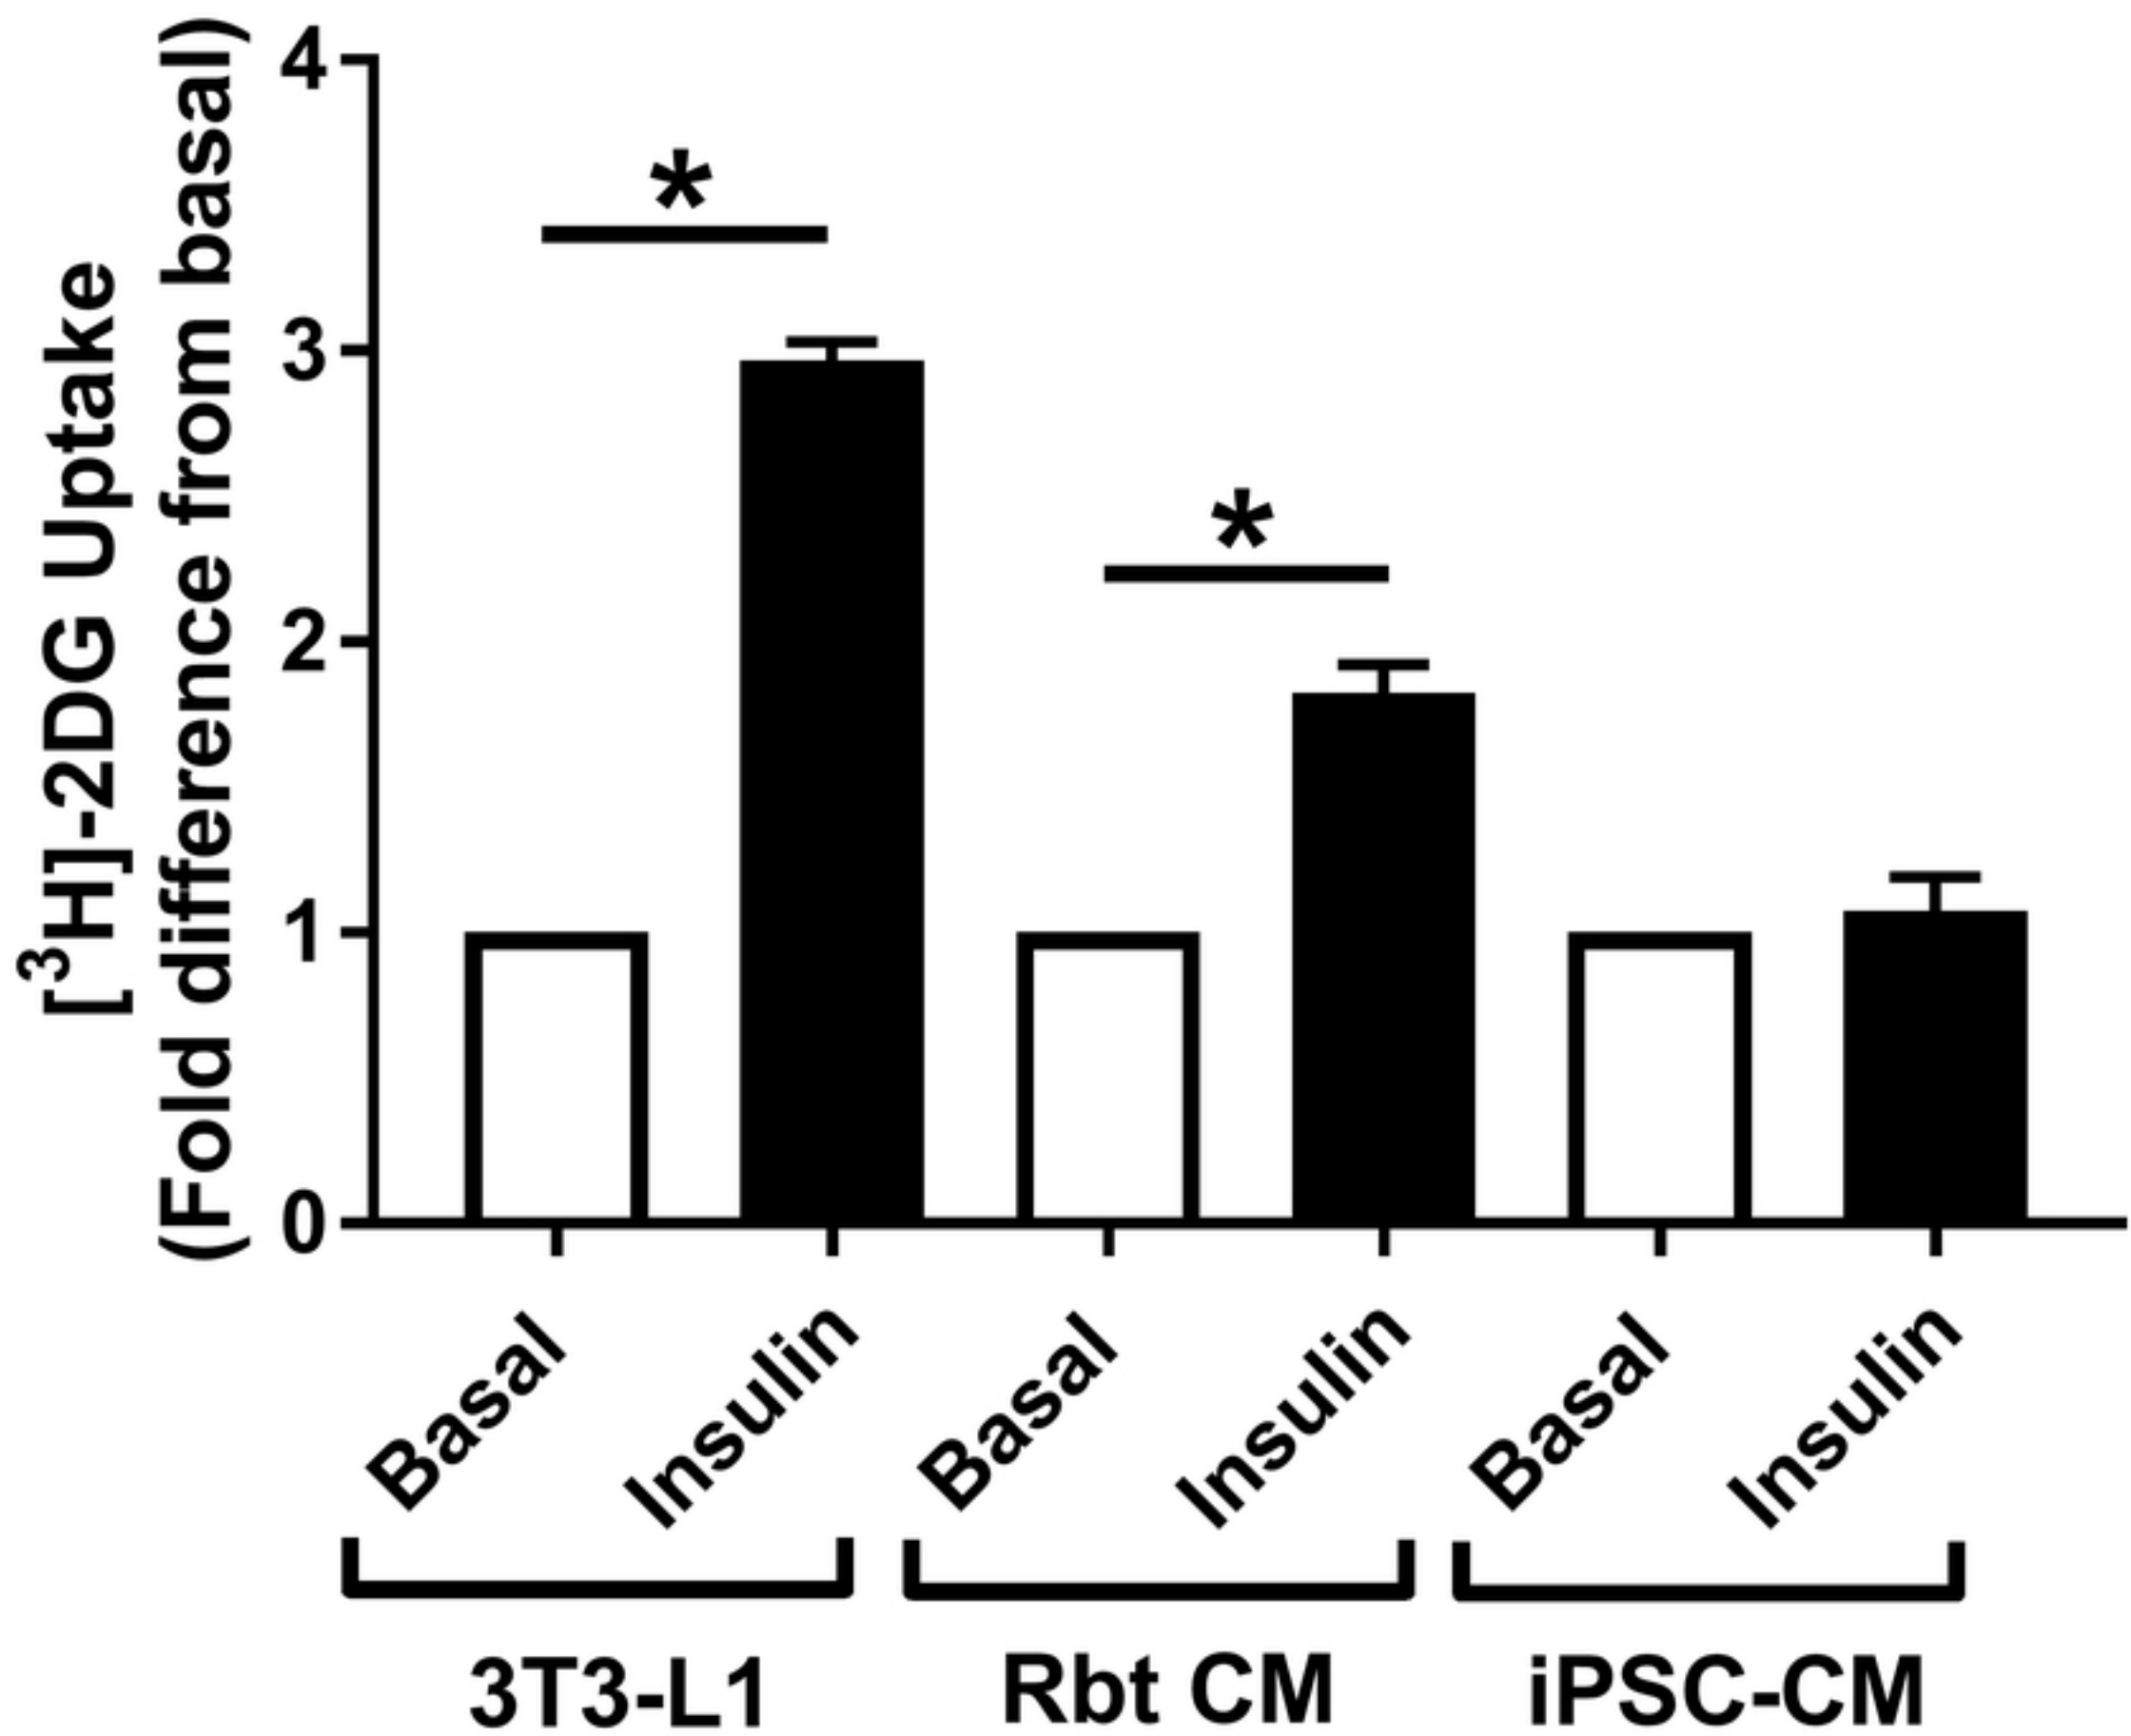

Fig.2

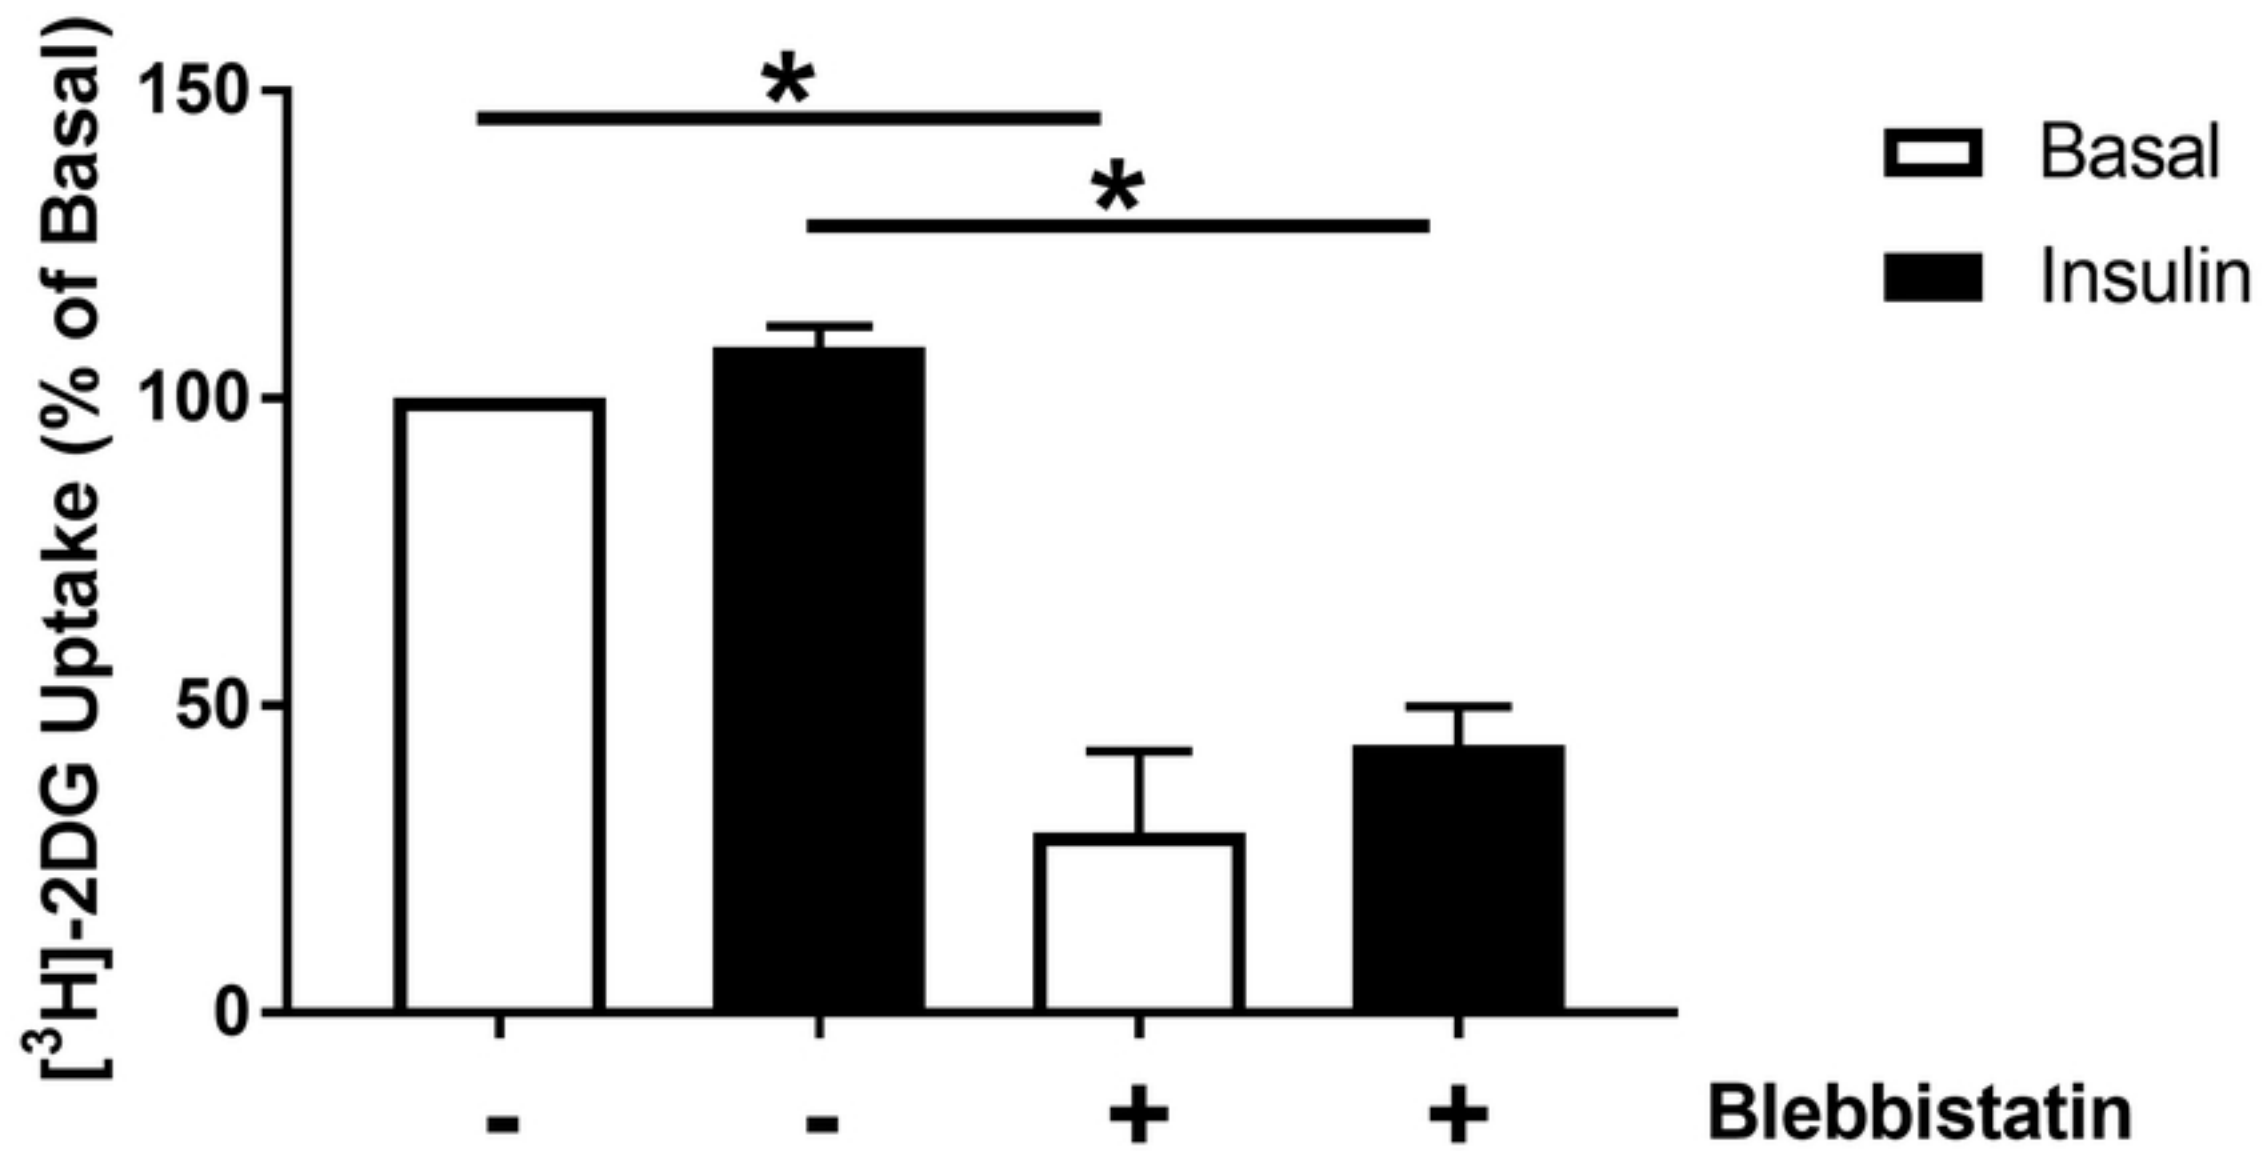

Fig. 3

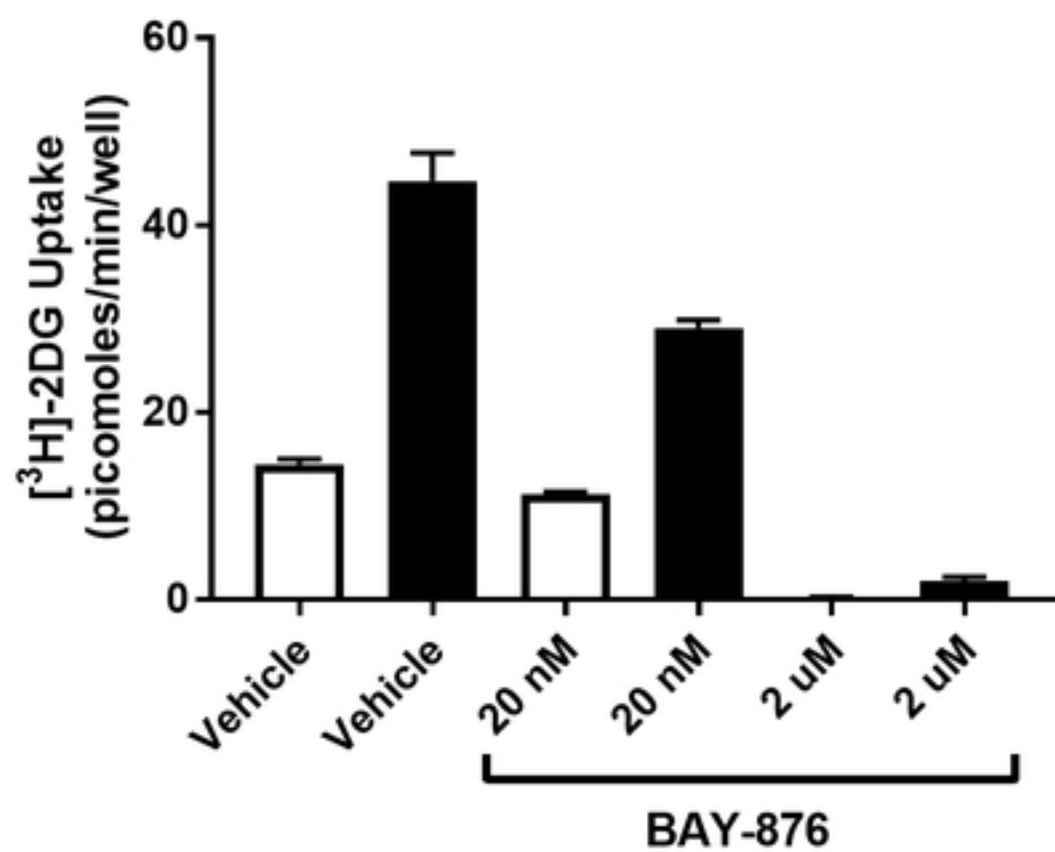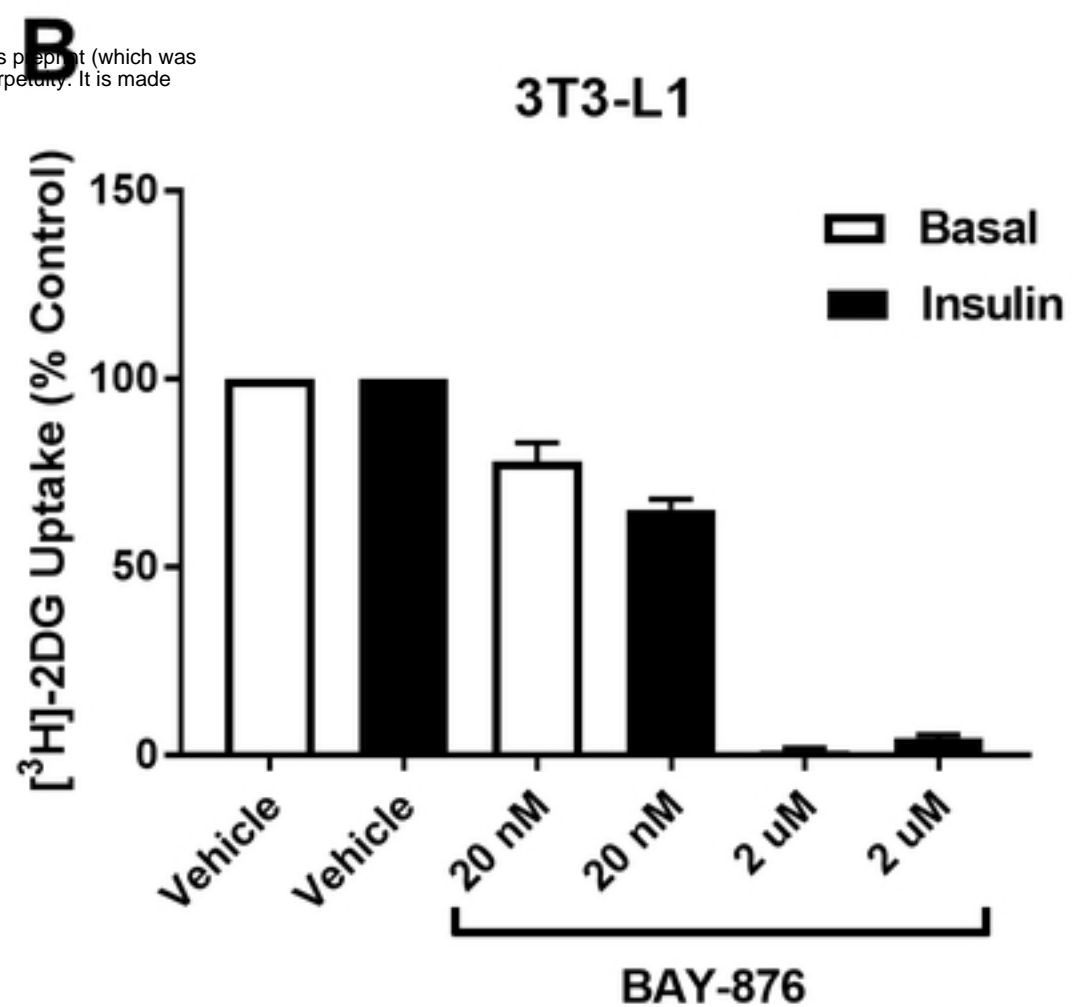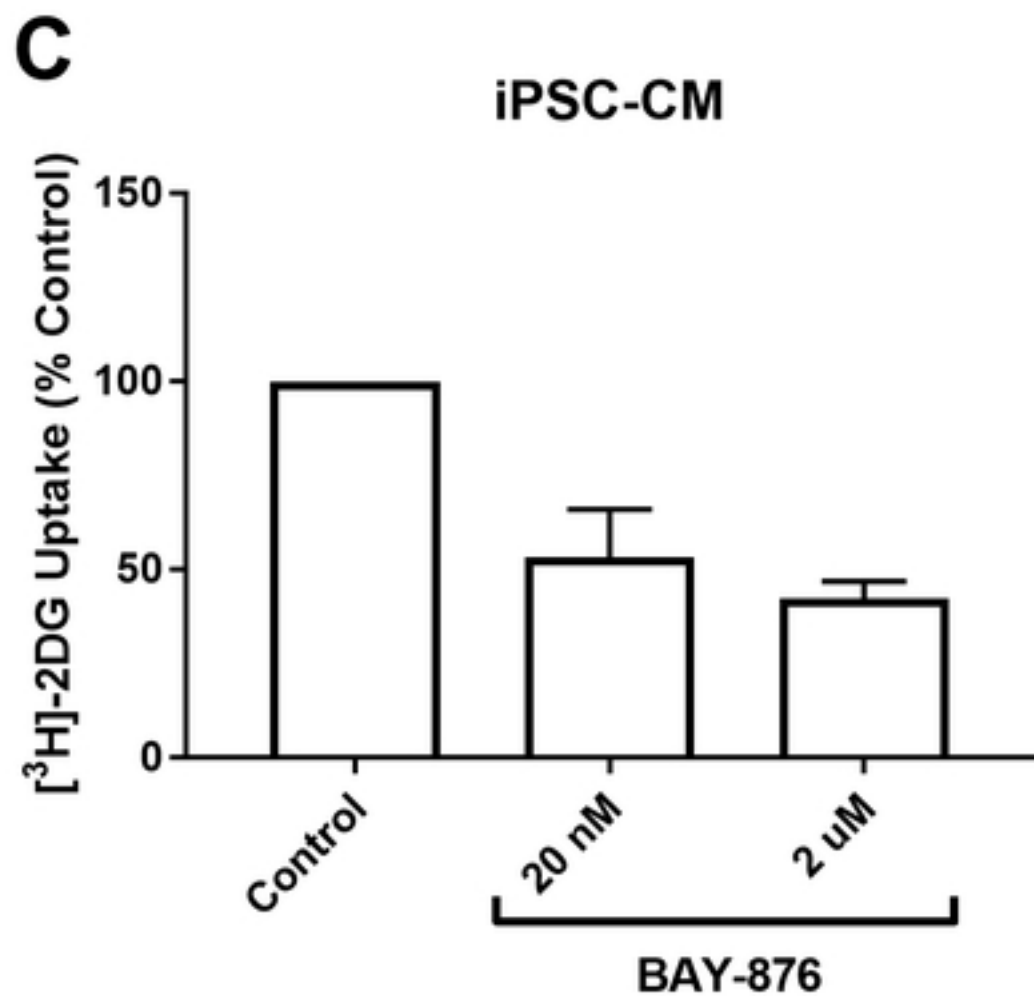

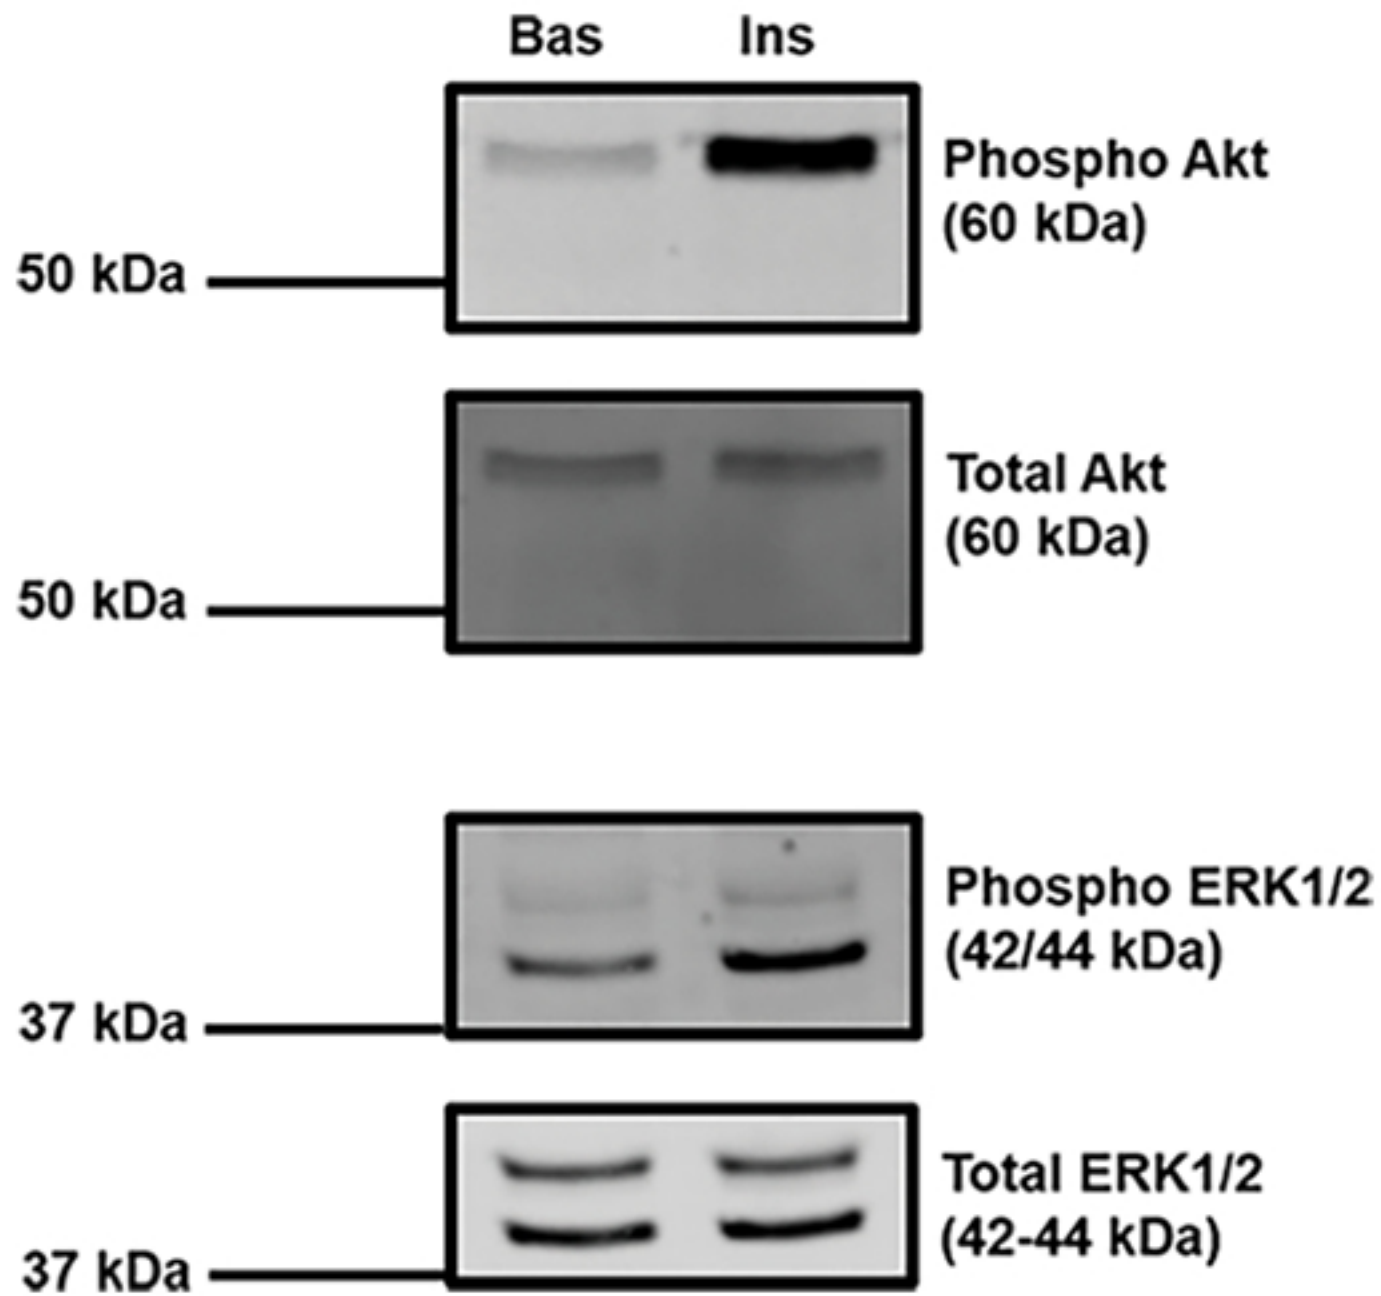

Fig. 1

**A**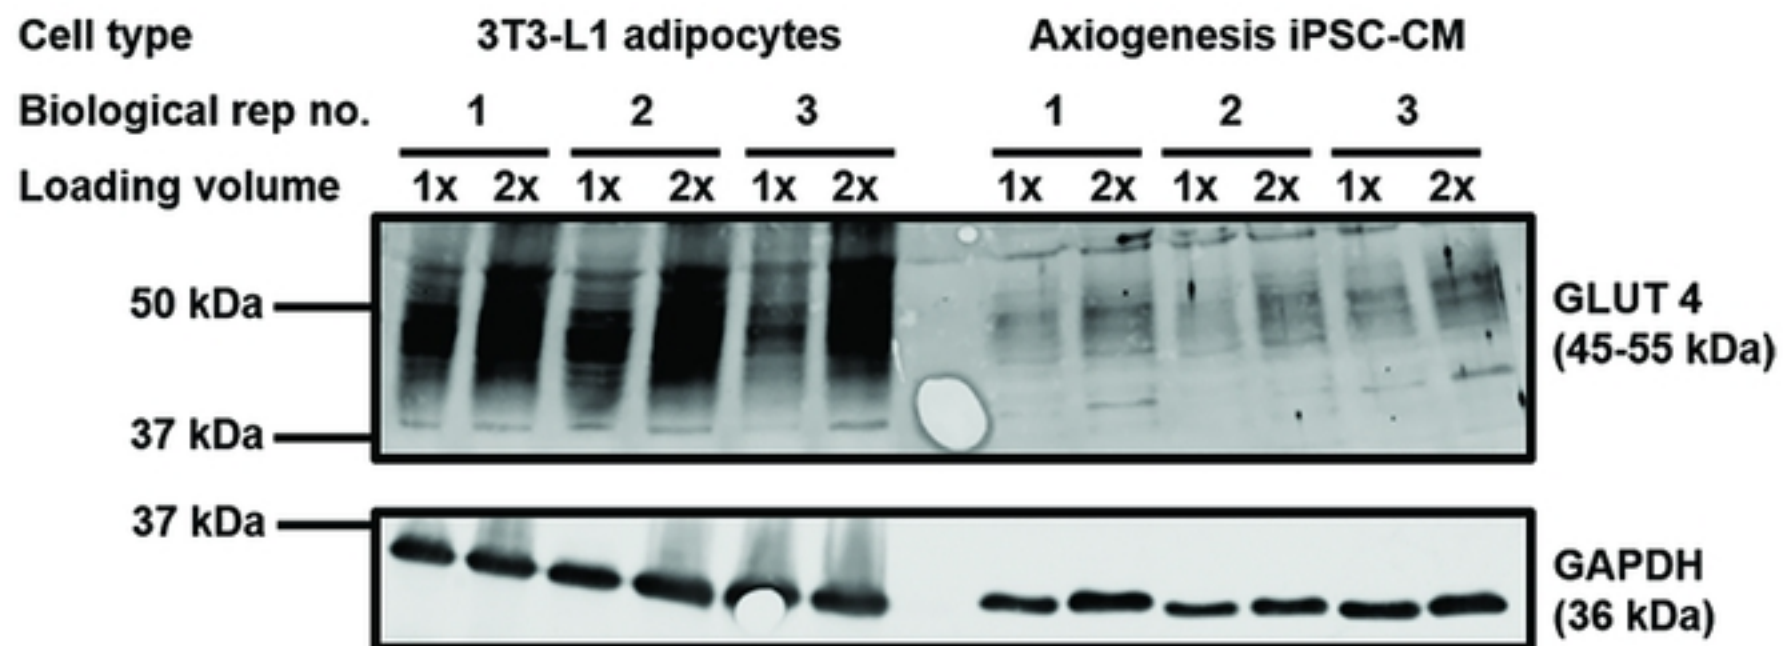**B**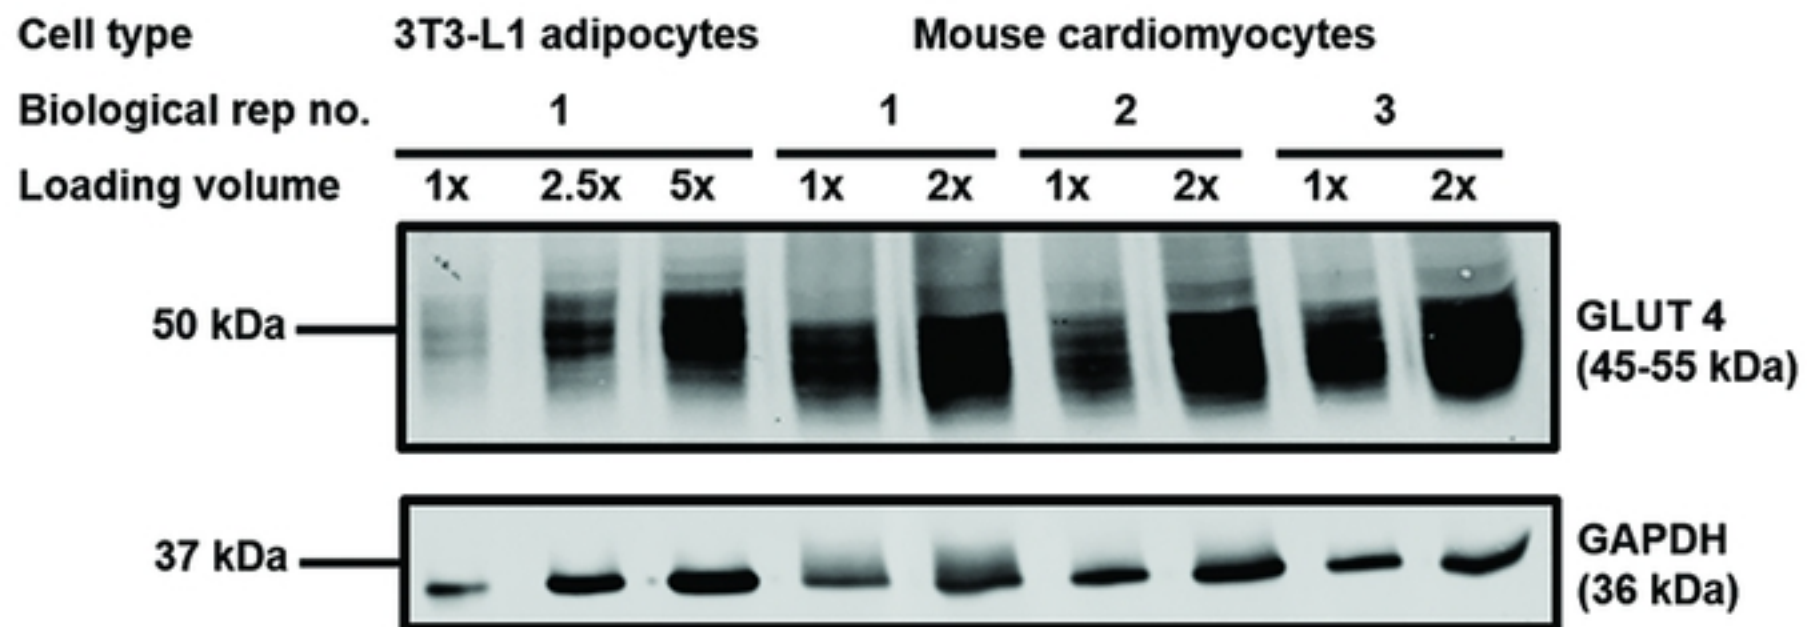

Fig. 4

**A**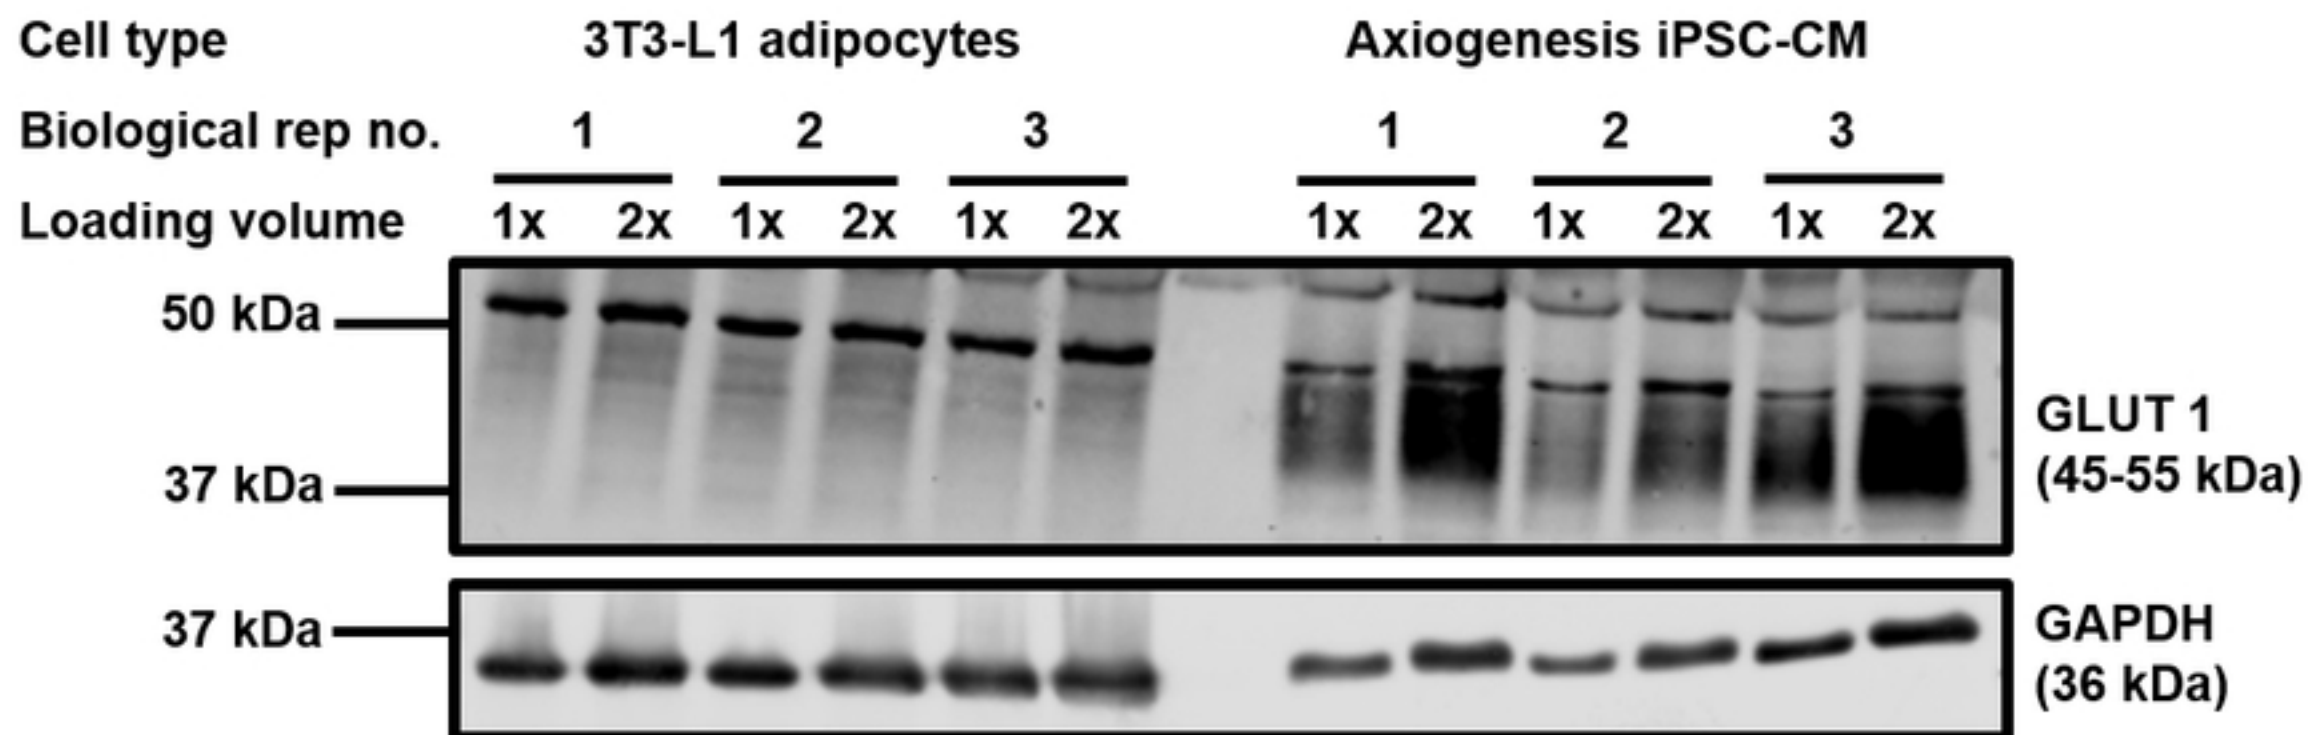**B**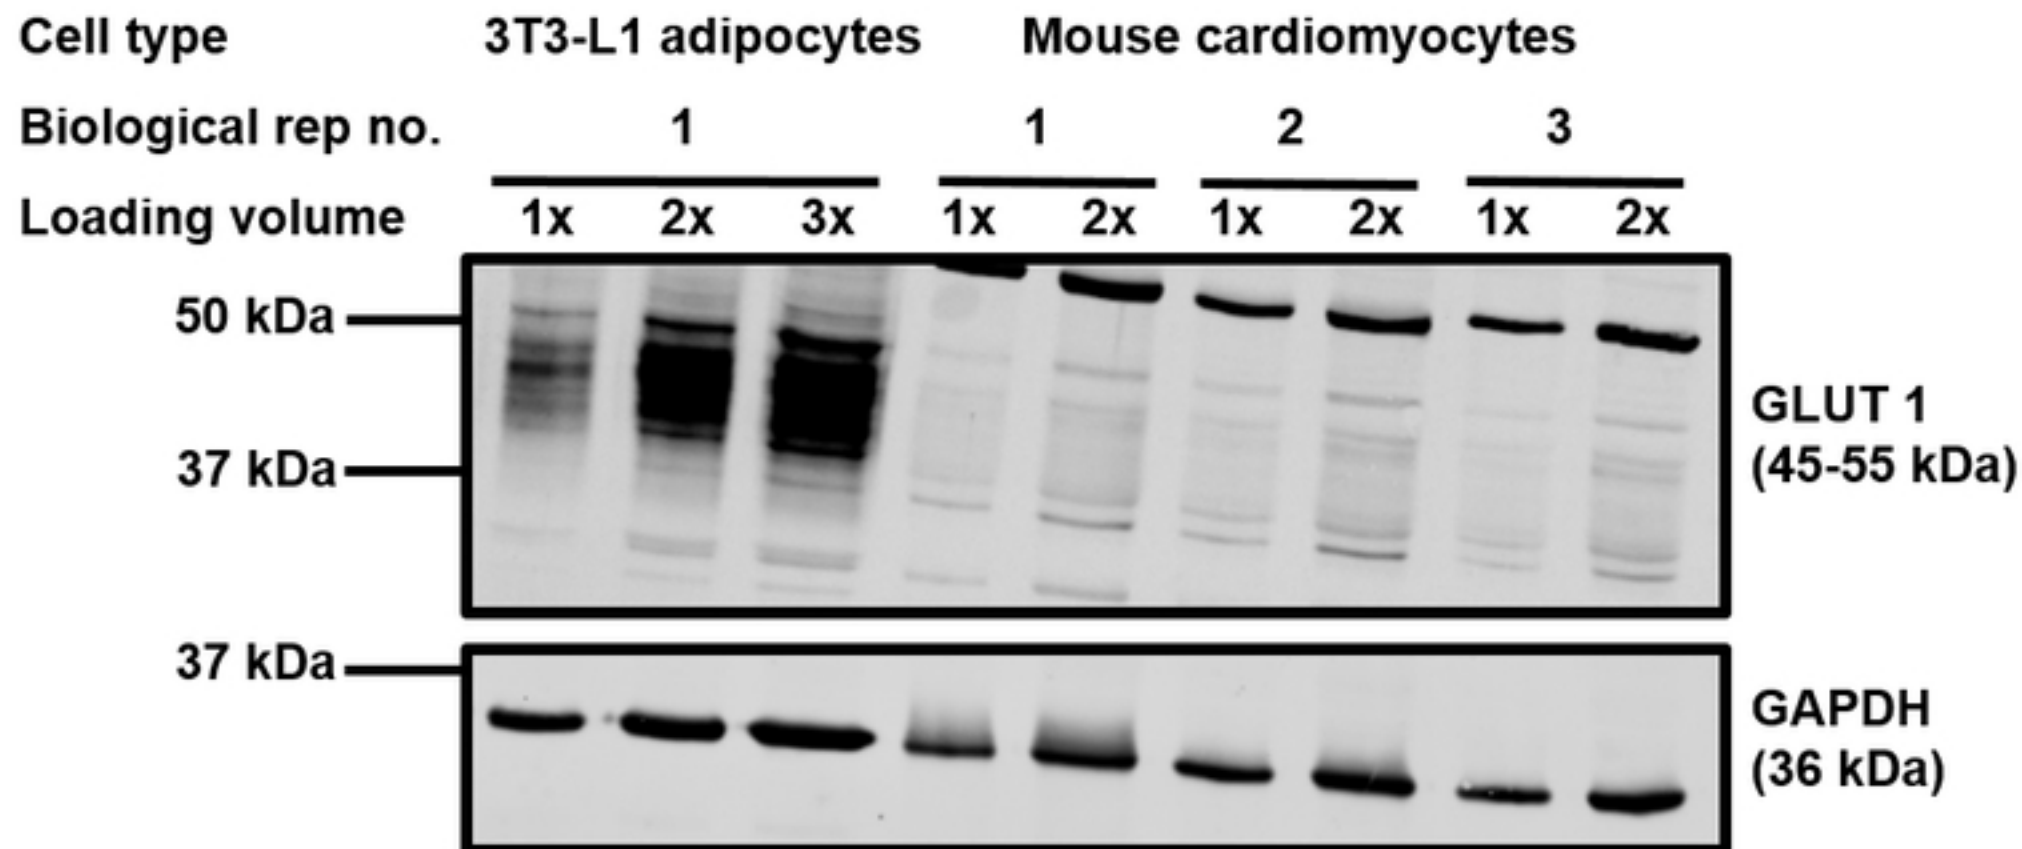

Fig. 5
